# Supplementary material
Source: PubMed Central journal article supplement (PMC3001296)
Supplement: NIHMS255477-supplement-Supplementary_Figure_Legends.pdf [file NIHMS255477-supplement-Supplementary_Figure_Legends.pdf]

### **Supplementary Figure 1**

Primers binding to a homologous region of MARCH4 and MARCH9 were used in a PCR with the indicated template. Two independent fibroblast samples were compared.

MARCH4 sequences were specifically digested with Sall and resolved by electrophoresis. Fibro = mouse adult fibroblasts. A representative experiment of two is shown.

### **Supplementary Figure 2**

3T3 cells transduced with empty retrovirus or retrovirus encoding MARCH9 were transfected with control oligos (solid line) or the indicated siRNA oligos (dashed line, M9=MARCH9). Mult1 expression was analyzed by flow cytometry 72 hrs after transfection. A representative experiment of two is shown.
