# Supplementary material
Source: PubMed Central journal article supplement (PMC3001296)

Supplementary Figure 1

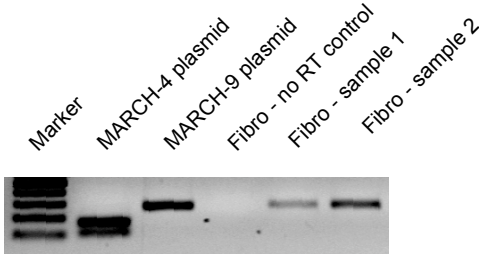

Supplementary Figure 2

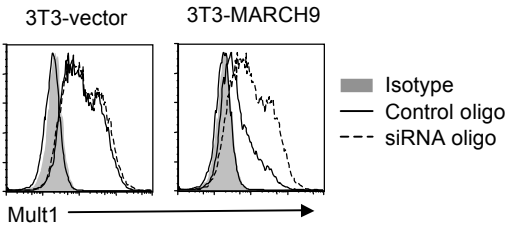

Supplement: NIHMS255477-supplement-Supplementary_Figures.pdf [file NIHMS255477-supplement-Supplementary_Figures.pdf]
